# Supplementary material for: Transition of rupture mode of strain crystallizing elastomers in tensile edge-crack tests
Source: Royal Society of Chemistry journal article supplement (doi:10.1039/d3sm00060e), 2023-01-01
Supplement: d3sm00060e1.pdf [file d3sm00060e1.pdf]

## Supporting Information

### Transition of rupture mode of strain crystallizing elastomers in tensile edge-crack test

Katsuhiko Tsunoda,<sup>a\*</sup>, Yuji Kitamura,<sup>a</sup>, and Kenji Urayama<sup>b\*</sup>

<sup>a</sup> Sustainable and Advanced Materials Division, Bridgestone Corporation, Tokyo 187-8531, Japan. E-mail: katsuhiko.tsunoda@bridgestone.com

<sup>b</sup> Sustainable and Advanced Materials Division, Bridgestone Corporation, Tokyo 187-8531, Japan.

<sup>c</sup> Department of Material Chemistry, Graduate School of Engineering, Kyoto University, Kyoto 615-8510, Japan. E-mail: urayama.kenji.2s@kyoto-u.ac.jp

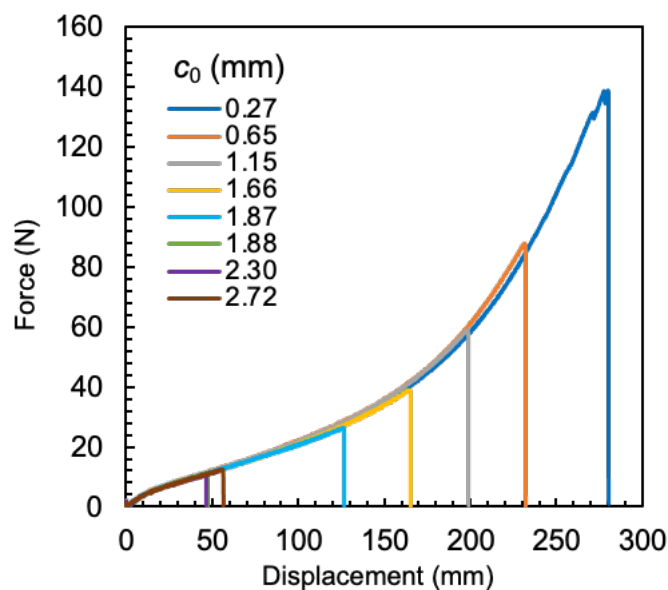

**Figure S1.** Tensile force-displacement curves for NR-B with various  $c_0$  values at 25 °C with a strain rate of  $0.11 \text{ s}^{-1}$  in the edge-crack test.
